# Supplementary material
Source: MDPI journal article supplement (https://www.mdpi.com/2674-032X/1/1/1)
Supplement: s1 [file s1]

## SUPPLEMENTARY MATERIAL

**Table S1.** Combinations of global (GCM) and regional (RCM) climate models (M1-M29) as well as analyzed model run under the climate change scenarios RCP4.5 and RCP8.5.

| Model | GCM          | RCM               | Run     | RCP4.5 | RCP8.5 |
|-------|--------------|-------------------|---------|--------|--------|
| M1    | CM5A-MR      | RACMO22E          | r1i1p1  |        | X      |
| M2    | CM5A-MR      | WRF381P           | r1i1p1  | X      | X      |
| M3    | CNRM-CM5     | CCLM4-8-17        | r1i1p1  | X      | X      |
| M4    | CNRM-CM5     | RACMO22E          | r1i1p1  | X      | X      |
| M5    | CNRM-CM5     | RCA4              | r1i1p1  | X      | X      |
| M6    | CNRM-CM5     | WRF381P           | r1i1p1  |        | X      |
| M7    | EC-EARTH     | CCLM4-8-17        | r12i1p1 | X      | X      |
| M8    | EC-EARTH     | RACMO22E          | r12i1p1 | X      | X      |
| M9    | EC-EARTH     | RACMO22E          | r1i1p1  | X      | X      |
| M10   | EC-EARTH     | RACMO22E          | r3i1p1  |        | X      |
| M11   | EC-EARTH     | RCA4              | r12i1p1 | X      | X      |
| M12   | EC-EARTH     | RCA4              | r1i1p1  |        | X      |
| M13   | EC-EARTH     | RCA4              | r3i1p1  |        | X      |
| M14   | IPSL-CM5A-MR | RCA4              | r1i1p1  | X      | X      |
| M15   | MPI-ESM-LR   | CCLM4-8-17        | r1i1p1  | X      | X      |
| M16   | MPI-ESM-LR   | COSMO-crCLIM-v1-1 | r1i1p1  |        | X      |
| M17   | MPI-ESM-LR   | COSMO-crCLIM-v1-1 | r2i1p1  |        | X      |
| M18   | MPI-ESM-LR   | RCA4              | r1i1p1  | X      | X      |
| M19   | MPI-ESM-LR   | RCA4              | r2i1p1  |        | X      |
| M20   | MPI-ESM-LR   | RCA4              | r3i1p1  |        | X      |
| M21   | MPI-ESM-LR   | REMO2009          | r1i1p1  | X      | X      |
| M22   | MPI-ESM-LR   | REMO2009          | r2i1p1  | X      | X      |
| M23   | MPI-ESM-LR   | RACMO22E          | r1i1p1  |        | X      |
| M24   | MPI-ESM-LR   | REMO2015          | r3i1p1  |        | X      |
| M25   | NorESM1-M    | COSMO-crCLIM-v1-1 | r1i1p1  |        | X      |
| M26   | NorESM1-M    | RACMO22E          | r1i1p1  |        | X      |
| M27   | NorESM1-M    | RCA4              | r1i1p1  |        | X      |
| M28   | NorESM1-M    | REMO2015          | r1i1p1  |        | X      |
| M29   | NorESM1-M    | WRF381P           | r1i1p1  |        | X      |

**Table S2.** Characteristics of the 96 evaluated repowering scenarios (S1-S96), including climate change scenarios (RCP), wind turbine type (WTT), geographical restriction criterion (GRC), and emission scenario (ES).

| Scenario | RCP | WTT | GRC | ES | Scenario | RCP | WTT | GRC | ES |
|----------|-----|-----|-----|----|----------|-----|-----|-----|----|
| S1       | 4.5 | 1   | W   | 1  | S2       | 8.5 | 1   | W   | 1  |
| S3       | 4.5 | 1   | W   | 2  | S4       | 8.5 | 1   | W   | 2  |
| S5       | 4.5 | 1   | W   | 3  | S6       | 8.5 | 1   | W   | 3  |
| S7       | 4.5 | 1   | W   | 4  | S8       | 8.5 | 1   | W   | 4  |
| S9       | 4.5 | 1   | M   | 1  | S10      | 8.5 | 1   | M   | 1  |
| S11      | 4.5 | 1   | M   | 2  | S12      | 8.5 | 1   | M   | 2  |
| S13      | 4.5 | 1   | M   | 3  | S14      | 8.5 | 1   | M   | 3  |
| S15      | 4.5 | 1   | M   | 4  | S16      | 8.5 | 1   | M   | 4  |
| S17      | 4.5 | 1   | S   | 1  | S18      | 8.5 | 1   | S   | 1  |
| S19      | 4.5 | 1   | S   | 2  | S20      | 8.5 | 1   | S   | 2  |
| S21      | 4.5 | 1   | S   | 3  | S22      | 8.5 | 1   | S   | 3  |
| S23      | 4.5 | 1   | S   | 4  | S24      | 8.5 | 1   | S   | 4  |
| S25      | 4.5 | 2   | W   | 1  | S26      | 8.5 | 2   | W   | 1  |
| S27      | 4.5 | 2   | W   | 2  | S28      | 8.5 | 2   | W   | 2  |
| S29      | 4.5 | 2   | W   | 3  | S30      | 8.5 | 2   | W   | 3  |
| S31      | 4.5 | 2   | W   | 4  | S32      | 8.5 | 2   | W   | 4  |
| S33      | 4.5 | 2   | M   | 1  | S34      | 8.5 | 2   | M   | 1  |
| S35      | 4.5 | 2   | M   | 2  | S36      | 8.5 | 2   | M   | 2  |
| S37      | 4.5 | 2   | M   | 3  | S38      | 8.5 | 2   | M   | 3  |
| S39      | 4.5 | 2   | M   | 4  | S40      | 8.5 | 2   | M   | 4  |
| S41      | 4.5 | 2   | S   | 1  | S42      | 8.5 | 2   | S   | 1  |
| S43      | 4.5 | 2   | S   | 2  | S44      | 8.5 | 2   | S   | 2  |
| S45      | 4.5 | 2   | S   | 3  | S46      | 8.5 | 2   | S   | 3  |
| S47      | 4.5 | 2   | S   | 4  | S48      | 8.5 | 2   | S   | 4  |
| S49      | 4.5 | 3   | W   | 1  | S50      | 8.5 | 3   | W   | 1  |
| S51      | 4.5 | 3   | W   | 2  | S52      | 8.5 | 3   | W   | 2  |
| S53      | 4.5 | 3   | W   | 3  | S54      | 8.5 | 3   | W   | 3  |
| S55      | 4.5 | 3   | W   | 4  | S56      | 8.5 | 3   | W   | 4  |
| S57      | 4.5 | 3   | M   | 1  | S58      | 8.5 | 3   | M   | 1  |
| S59      | 4.5 | 3   | M   | 2  | S60      | 8.5 | 3   | M   | 2  |
| S61      | 4.5 | 3   | M   | 3  | S62      | 8.5 | 3   | M   | 3  |
| S63      | 4.5 | 3   | M   | 4  | S64      | 8.5 | 3   | M   | 4  |
| S65      | 4.5 | 3   | S   | 1  | S66      | 8.5 | 3   | S   | 1  |
| S67      | 4.5 | 3   | S   | 2  | S68      | 8.5 | 3   | S   | 2  |
| S69      | 4.5 | 3   | S   | 3  | S70      | 8.5 | 3   | S   | 3  |
| S71      | 4.5 | 3   | S   | 4  | S72      | 8.5 | 3   | S   | 4  |
| S73      | 4.5 | 4   | W   | 1  | S74      | 8.5 | 4   | W   | 1  |
| S75      | 4.5 | 4   | W   | 2  | S76      | 8.5 | 4   | W   | 2  |
| S77      | 4.5 | 4   | W   | 3  | S78      | 8.5 | 4   | W   | 3  |
| S79      | 4.5 | 4   | W   | 4  | S80      | 8.5 | 4   | W   | 4  |
| S81      | 4.5 | 4   | M   | 1  | S82      | 8.5 | 4   | M   | 1  |
| S83      | 4.5 | 4   | M   | 2  | S84      | 8.5 | 4   | M   | 2  |
| S85      | 4.5 | 4   | M   | 3  | S86      | 8.5 | 4   | M   | 3  |
| S87      | 4.5 | 4   | M   | 4  | S88      | 8.5 | 4   | M   | 4  |
| S89      | 4.5 | 4   | S   | 1  | S90      | 8.5 | 4   | S   | 1  |
| S91      | 4.5 | 4   | S   | 2  | S92      | 8.5 | 4   | S   | 2  |
| S93      | 4.5 | 4   | S   | 3  | S94      | 8.5 | 4   | S   | 3  |
| S95      | 4.5 | 4   | S   | 4  | S96      | 8.5 | 4   | S   | 4  |
